# Supplementary material for: Expression of R345W-Fibulin-3 Induces Epithelial-Mesenchymal Transition in Retinal Pigment Epithelial Cells
Source: Front Cell Dev Biol. 2020 Jun 19;8:469. doi: 10.3389/fcell.2020.00469 (PMC7317295; doi:10.3389/fcell.2020.00469)
Supplement: TABLE S1 — PCR primers used in this paper. [file Table_1.xlsx]

## Sheet: Real-time PCR primers
Supplemental Table 1: PCR primers used in this paper.
Genes		Forward / Reverse primer (5' --> 3')	Amplicon size (bp)
BEST1	bestrophin 1	TCCGTCGAGCCTCCTTTATG
		CCTGATTGGGCTGGAACTCC	78bp
CRALBP	cellular retinaldehyde binding protein	TCCGGACTTCAGATCTCAGG
		CATGGCTGGTGGATGAAGTG	91bp
RPE65	retinal pigment epithelium-specific 65 kDa protein	AGAGCCTGATTCATACCCATCA
		ACCACACTCAGAACTACACCA	87bp
TRPM1	transient receptor potential cation channel subfamily M member 1	GCATCCGGGTCACTTCTGA
		GTCGAAGGTCAACAGTCTGC	108bp
TGFB2	transforming growth factor beta 2	CAGTTCCCTTCTGCGACATA
		GCTCGATAAGGTGGTGCTTG	101bp
ZEB1	zinc finger E-box binding homeobox 1	CCCTTGAAAGTGATCCAGCC
		GGGCGGTGTAGAATCAGAGT	108bp
VIM	vimentin	GATTCACTCCCTCTGGTTGAT
		CGTGATGCTGAGAAGTTTCGT	103bp
CDH2	cadherin 2	CCAGTATCCGGTCCGATCTG
		GGGAGTCATATGGTGGAGCT	110bp
GAPDH	glyceraldehyde 3-phosphate dehydrogenase	CGTGGAAGGACTCATGACCA
		CATCACGCCACAGTTTCCC	86bp
